# Supplementary material for: Investigating the impact of stigma, accessibility and confidentiality on STI/STD/HIV self-testing among college students in the USA: protocol for a scoping review
Source: PubMed Central journal article supplement — BMJ Open. 2023 Feb 15;13(2):e069574. doi: 10.1136/bmjopen-2022-069574 (PMC9933744; doi:10.1136/bmjopen-2022-069574), 2023-02-15
Supplement: bmjopen-2022-069574supp001.pdf [file bmjopen-2022-069574supp001.pdf]

**Supplement 1: Scoping review protocol's Search Strategies.**

**“Investigating the impact of stigma, accessibility and confidentiality on STI/STD/HIV self-testing among college students in the United States: A protocol for a scoping review”**

## OVID Medline.

| #  | Query                                                                                                                                                                                                                                                                                                                                                                                                                                                                                                                                                                                                                                                                                                                                                                                                                                                                                                                                                                                                                                                                                                                                                                                                                                                                                                                                                                                                                                                                                                                                                                                                                        |
|----|------------------------------------------------------------------------------------------------------------------------------------------------------------------------------------------------------------------------------------------------------------------------------------------------------------------------------------------------------------------------------------------------------------------------------------------------------------------------------------------------------------------------------------------------------------------------------------------------------------------------------------------------------------------------------------------------------------------------------------------------------------------------------------------------------------------------------------------------------------------------------------------------------------------------------------------------------------------------------------------------------------------------------------------------------------------------------------------------------------------------------------------------------------------------------------------------------------------------------------------------------------------------------------------------------------------------------------------------------------------------------------------------------------------------------------------------------------------------------------------------------------------------------------------------------------------------------------------------------------------------------|
| 1  | exp HIV Infections/ or exp HIV/                                                                                                                                                                                                                                                                                                                                                                                                                                                                                                                                                                                                                                                                                                                                                                                                                                                                                                                                                                                                                                                                                                                                                                                                                                                                                                                                                                                                                                                                                                                                                                                              |
| 2  | (hiv* or hiv infect* or human immunodeficiency virus or human immunodeficiency virus or human immune deficiency virus or human immune deficiency virus or acquired immunodeficiency syndrome or acquired immunodeficiency syndrome or acquired immune deficiency syndrome or acquired immune deficiency syndrome).ti,ab.                                                                                                                                                                                                                                                                                                                                                                                                                                                                                                                                                                                                                                                                                                                                                                                                                                                                                                                                                                                                                                                                                                                                                                                                                                                                                                     |
| 3  | 1 or 2                                                                                                                                                                                                                                                                                                                                                                                                                                                                                                                                                                                                                                                                                                                                                                                                                                                                                                                                                                                                                                                                                                                                                                                                                                                                                                                                                                                                                                                                                                                                                                                                                       |
| 4  | exp sexually transmitted infections/ or exp hepatitis b/ or exp herpes genitalis/ or exp syphilis/ or exp gonorrhea/ or exp chlamydia trachomatis/ or exp calymmatobacterium/ or exp trichomonas vaginitis/ or exp Alphanpapillomavirus/ or exp Human papillomavirus 6/ or exp Human papillomavirus 11/ or exp Human papillomavirus 16/ or exp Human papillomavirus 18/ or exp Human papillomavirus 31/ or exp Betapapillomavirus/ or exp Gammapapillomavirus/ or exp granuloma Inguinale/                                                                                                                                                                                                                                                                                                                                                                                                                                                                                                                                                                                                                                                                                                                                                                                                                                                                                                                                                                                                                                                                                                                                   |
| 5  | (sexually transmitted disease* or sexually transmissible disease* or sexually transmitted infection* or sexually transmissible infection* or sexually transmitted infectious disease* or sexually transmissible infectious disease* or sexually transmitted disorder* or sexually transmissible disorder* or STI or STIs or STD or STIs or venereal disease* or venereal infection* or venereal disorder* or genital herpes or herpes genitalis or genital infection* or genital disorder* or herpes simplex or herpes virus or HSV*).ti,ab. or chancroid/ or chancroid*.ti,ab. or haemophilus ducreyi.ti,ab. or chlamydia infection*.ti,ab. or chlamydia trachomatis.ti,ab. or gonorrhoea*.ti,ab. or gonorrhea*.ti,ab. or syphilis.ti,ab. or syphillis.ti,ab. or condylomata lata.ti,ab. or chancre*.ti,ab. or lymphogranuloma venereum.ti,ab. or lymphogranuloma venereum.ti,ab. or granuloma inguinale.ti,ab. or donovania.ti,ab. or donovanosis.ti,ab. or calymmatobacterium granulomatis.ti,ab. or klebsiella granulomatis.ti,ab. or klebsiella granulomatis.ti,ab. or treponema pallidum.ti,ab. or treponema pallidum.ti,ab. or genital wart*.ti,ab. or venereal wart*.ti,ab. or condylomata acuminata.ti,ab. or human papillomavirus 6.ti,ab. or hpv*.ti,ab. or hpv6.ti,ab. or human papillomavirus.ti,ab. or hepatitis b.ti,ab. or trichomonas vaginitis.ti,ab. or genital ulcer*.ti,ab. or anogenital ulcer*.ti,ab. or anorectal ulcer*.ti,ab. or anorectal ulcer*.ti,ab. or penile ulcer*.ti,ab. or human papillomavirus*.ti,ab. or hpv.ti,ab. or recurrent respiratory papillomatosis.ti,ab. or condyloma*.ti,ab. |
| 6  | 4 or 5                                                                                                                                                                                                                                                                                                                                                                                                                                                                                                                                                                                                                                                                                                                                                                                                                                                                                                                                                                                                                                                                                                                                                                                                                                                                                                                                                                                                                                                                                                                                                                                                                       |
| 7  | 3 or 6                                                                                                                                                                                                                                                                                                                                                                                                                                                                                                                                                                                                                                                                                                                                                                                                                                                                                                                                                                                                                                                                                                                                                                                                                                                                                                                                                                                                                                                                                                                                                                                                                       |
| 8  | exp Self-Testing/                                                                                                                                                                                                                                                                                                                                                                                                                                                                                                                                                                                                                                                                                                                                                                                                                                                                                                                                                                                                                                                                                                                                                                                                                                                                                                                                                                                                                                                                                                                                                                                                            |
| 9  | ((home adj testing) or self test* or self sample or self sampling or rapid diagnostic test*).tw,kf.                                                                                                                                                                                                                                                                                                                                                                                                                                                                                                                                                                                                                                                                                                                                                                                                                                                                                                                                                                                                                                                                                                                                                                                                                                                                                                                                                                                                                                                                                                                          |
| 10 | (self collect* or home-based HIV test* or home-based STI test* or home-based STD test* or ((community-based or community-led or community-driven) adj3 test*)).tw,kf.                                                                                                                                                                                                                                                                                                                                                                                                                                                                                                                                                                                                                                                                                                                                                                                                                                                                                                                                                                                                                                                                                                                                                                                                                                                                                                                                                                                                                                                        |
| 11 | 8 or 9 or 10                                                                                                                                                                                                                                                                                                                                                                                                                                                                                                                                                                                                                                                                                                                                                                                                                                                                                                                                                                                                                                                                                                                                                                                                                                                                                                                                                                                                                                                                                                                                                                                                                 |
| 12 | 7 and 11                                                                                                                                                                                                                                                                                                                                                                                                                                                                                                                                                                                                                                                                                                                                                                                                                                                                                                                                                                                                                                                                                                                                                                                                                                                                                                                                                                                                                                                                                                                                                                                                                     |

|    |                                                                      |
|----|----------------------------------------------------------------------|
| 13 | exp Students/ or exp Universities/                                   |
| 14 | exp Young Adult/ or exp Adolescent/                                  |
| 15 | (college student* or higher education or teen* or adolescen*).tw,kf. |
| 16 | 13 or 14 or 15                                                       |
| 17 | 12 and 16                                                            |

## OVID EMBASE.

| #  | Query                                                                                                                                                                                                                                                                                                                                                                                                                                                                                                                                                                                                                                                                                                                                                                                                                                                                                                                                                                                                                                                                                                                                                                                                                                                                                                                                                                                                                                                                                                                                            |
|----|--------------------------------------------------------------------------------------------------------------------------------------------------------------------------------------------------------------------------------------------------------------------------------------------------------------------------------------------------------------------------------------------------------------------------------------------------------------------------------------------------------------------------------------------------------------------------------------------------------------------------------------------------------------------------------------------------------------------------------------------------------------------------------------------------------------------------------------------------------------------------------------------------------------------------------------------------------------------------------------------------------------------------------------------------------------------------------------------------------------------------------------------------------------------------------------------------------------------------------------------------------------------------------------------------------------------------------------------------------------------------------------------------------------------------------------------------------------------------------------------------------------------------------------------------|
| 1  | exp Human immunodeficiency virus/ or exp Human immunodeficiency virus infection/                                                                                                                                                                                                                                                                                                                                                                                                                                                                                                                                                                                                                                                                                                                                                                                                                                                                                                                                                                                                                                                                                                                                                                                                                                                                                                                                                                                                                                                                 |
| 2  | (hiv* or hiv infect* or human immunodeficiency virus or human immunodeficiency virus or human immune deficiency virus or human immune deficiency virus or acquired immunodeficiency syndrome or acquired immunodeficiency syndrome or acquired immune deficiency syndrome or acquired immune deficiency syndrome).ti,ab.                                                                                                                                                                                                                                                                                                                                                                                                                                                                                                                                                                                                                                                                                                                                                                                                                                                                                                                                                                                                                                                                                                                                                                                                                         |
| 3  | 1 or 2                                                                                                                                                                                                                                                                                                                                                                                                                                                                                                                                                                                                                                                                                                                                                                                                                                                                                                                                                                                                                                                                                                                                                                                                                                                                                                                                                                                                                                                                                                                                           |
| 4  | exp sexually transmitted disease/ or exp hepatitis B/ or exp genital herpes/ or exp syphilis/ or exp gonorrhoea/ or exp Chlamydia trachomatis/ or exp Klebsiella/ or exp vaginal trichomoniasis/ or exp Alphapapillomavirus/ or exp Wart virus/ or exp granuloma inguinale/ or exp Gammapapillomavirus/ or exp betapapillomavirus/                                                                                                                                                                                                                                                                                                                                                                                                                                                                                                                                                                                                                                                                                                                                                                                                                                                                                                                                                                                                                                                                                                                                                                                                               |
| 5  | (sexually transmitted disease* or sexually transmissible disease* or sexually transmitted infection* or sexually transmissible infection* or sexually transmitted infectious disease* or sexually transmissible infectious disease* or sexually transmitted disorder* or sexually transmissible disorder* or STI or STIs or STD or STDs or venereal disease* or venereal infection* or venereal disorder* or genital herpes or herpes genitalis or genital infection* or genital disorder* or herpes simplex or herpes virus or HSV* or chancroid or chancroid* or haemophilus ducreyi or chlamydia infection* or chlamydia trachomatis or gonorrhoea* or gonorrhoea* or syphilis or syphillis or condylomata lata or chancre*).ti,ab. or lymphogranuloma venereum/ or lymphogranuloma venereum.ti,ab. or granuloma inguinale.ti,ab. or donovania.ti,ab. or donovanosis.ti,ab. or calymmatobacterium granulomatis.ti,ab. or klebsiella granulomatis.ti,ab. or klebsiella granulomatis.ti,ab. or treponema pallidum.ti,ab. or treponema pallidum.ti,ab. or genital wart*.ti,ab. or venereal wart*.ti,ab. or condylomata acuminata.ti,ab. or human papillomavirus 6.ti,ab. or hpv*.ti,ab. or hpv6.ti,ab. or human papillomavirus.ti,ab. or hepatitis b.ti,ab. or trichomonas vaginitis.ti,ab. or genital ulcer*.ti,ab. or anogenital ulcer*.ti,ab. or anorectal ulcer*.ti,ab. or anorectal ulcer*.ti,ab. or penile ulcer*.ti,ab. or human papillomavirus*.ti,ab. or hpv.ti,ab. or recurrent respiratory papillomatosis.ti,ab. or condyloma*.ti,ab. |
| 6  | 4 or 5                                                                                                                                                                                                                                                                                                                                                                                                                                                                                                                                                                                                                                                                                                                                                                                                                                                                                                                                                                                                                                                                                                                                                                                                                                                                                                                                                                                                                                                                                                                                           |
| 7  | 3 or 6                                                                                                                                                                                                                                                                                                                                                                                                                                                                                                                                                                                                                                                                                                                                                                                                                                                                                                                                                                                                                                                                                                                                                                                                                                                                                                                                                                                                                                                                                                                                           |
| 8  | exp self-testing/                                                                                                                                                                                                                                                                                                                                                                                                                                                                                                                                                                                                                                                                                                                                                                                                                                                                                                                                                                                                                                                                                                                                                                                                                                                                                                                                                                                                                                                                                                                                |
| 9  | ((home adj testing) or self test* or self sample or self sampling or rapid diagnostic test*).tw,kf.                                                                                                                                                                                                                                                                                                                                                                                                                                                                                                                                                                                                                                                                                                                                                                                                                                                                                                                                                                                                                                                                                                                                                                                                                                                                                                                                                                                                                                              |
| 10 | (self collect* or home-based HIV test* or home-based STI test* or home-based STD test* or ((community-based or community-led or community-driven) adj3 test*)).tw,kf.                                                                                                                                                                                                                                                                                                                                                                                                                                                                                                                                                                                                                                                                                                                                                                                                                                                                                                                                                                                                                                                                                                                                                                                                                                                                                                                                                                            |
| 11 | 8 or 9 or 10                                                                                                                                                                                                                                                                                                                                                                                                                                                                                                                                                                                                                                                                                                                                                                                                                                                                                                                                                                                                                                                                                                                                                                                                                                                                                                                                                                                                                                                                                                                                     |
| 12 | exp student/ or exp university/ or exp university student/ or exp young adult/ or exp adolescent/                                                                                                                                                                                                                                                                                                                                                                                                                                                                                                                                                                                                                                                                                                                                                                                                                                                                                                                                                                                                                                                                                                                                                                                                                                                                                                                                                                                                                                                |
| 13 | (college student* or university student* or higher education or teen* or adolescen*).tw,kf.                                                                                                                                                                                                                                                                                                                                                                                                                                                                                                                                                                                                                                                                                                                                                                                                                                                                                                                                                                                                                                                                                                                                                                                                                                                                                                                                                                                                                                                      |
| 14 | 12 or 13                                                                                                                                                                                                                                                                                                                                                                                                                                                                                                                                                                                                                                                                                                                                                                                                                                                                                                                                                                                                                                                                                                                                                                                                                                                                                                                                                                                                                                                                                                                                         |
| 15 | 7 and 11 and 14                                                                                                                                                                                                                                                                                                                                                                                                                                                                                                                                                                                                                                                                                                                                                                                                                                                                                                                                                                                                                                                                                                                                                                                                                                                                                                                                                                                                                                                                                                                                  |

## CINAHL Complete

| #   | Query                                                                                                                                                                                                                                                                                                                                                                                                                                                                                                                                                                                                                                                                                                                                                                                                                                                                                                                                                                                                                                                                                                                                                                                                                                                                                                                                                                                                                                     |
|-----|-------------------------------------------------------------------------------------------------------------------------------------------------------------------------------------------------------------------------------------------------------------------------------------------------------------------------------------------------------------------------------------------------------------------------------------------------------------------------------------------------------------------------------------------------------------------------------------------------------------------------------------------------------------------------------------------------------------------------------------------------------------------------------------------------------------------------------------------------------------------------------------------------------------------------------------------------------------------------------------------------------------------------------------------------------------------------------------------------------------------------------------------------------------------------------------------------------------------------------------------------------------------------------------------------------------------------------------------------------------------------------------------------------------------------------------------|
| S11 | S4 AND S7 AND S10                                                                                                                                                                                                                                                                                                                                                                                                                                                                                                                                                                                                                                                                                                                                                                                                                                                                                                                                                                                                                                                                                                                                                                                                                                                                                                                                                                                                                         |
| S10 | S8 OR S9                                                                                                                                                                                                                                                                                                                                                                                                                                                                                                                                                                                                                                                                                                                                                                                                                                                                                                                                                                                                                                                                                                                                                                                                                                                                                                                                                                                                                                  |
| S9  | "college student*" OR "university student*" OR higher education" OR "teen*" OR "adolescen*"                                                                                                                                                                                                                                                                                                                                                                                                                                                                                                                                                                                                                                                                                                                                                                                                                                                                                                                                                                                                                                                                                                                                                                                                                                                                                                                                               |
| S8  | (MH "student+") or (MH "university+") OR (MH "university student+") OR (MH "young adult+") or (MH "adolescent+")                                                                                                                                                                                                                                                                                                                                                                                                                                                                                                                                                                                                                                                                                                                                                                                                                                                                                                                                                                                                                                                                                                                                                                                                                                                                                                                          |
| S7  | S5 OR S6                                                                                                                                                                                                                                                                                                                                                                                                                                                                                                                                                                                                                                                                                                                                                                                                                                                                                                                                                                                                                                                                                                                                                                                                                                                                                                                                                                                                                                  |
| S6  | "home test*" OR "self test*" OR "self sample" OR "self sampling" OR "rapid diagnostic test*" OR "self collect*" OR "home-based HIV test*" OR "home-based STI test*" OR "home-based STD test*" OR "community-based test*" OR "community-led test" OR "community-driven test"                                                                                                                                                                                                                                                                                                                                                                                                                                                                                                                                                                                                                                                                                                                                                                                                                                                                                                                                                                                                                                                                                                                                                               |
| S5  | (MH "self-testing+")                                                                                                                                                                                                                                                                                                                                                                                                                                                                                                                                                                                                                                                                                                                                                                                                                                                                                                                                                                                                                                                                                                                                                                                                                                                                                                                                                                                                                      |
| S4  | S1 OR S2 OR S3                                                                                                                                                                                                                                                                                                                                                                                                                                                                                                                                                                                                                                                                                                                                                                                                                                                                                                                                                                                                                                                                                                                                                                                                                                                                                                                                                                                                                            |
| S3  | "hiv"OR "hiv infection"OR "human immunodeficiency virus"OR "human immunodeficiency virus"OR "human immune deficiency virus"OR "acquired immunodeficiency syndrome"OR "acquired immunodeficiency syndrome"OR "acquired immune deficiency syndrome"                                                                                                                                                                                                                                                                                                                                                                                                                                                                                                                                                                                                                                                                                                                                                                                                                                                                                                                                                                                                                                                                                                                                                                                         |
| S2  | "sexually transmitted disease" OR "sexually transmissible disease" OR "sexually transmitted infection" OR "sexually transmissible infection" OR "sexually transmitted infectious disease" OR "sexually transmissible infectious disease" OR "sexually transmitted disorder" OR "sexually transmissible disorder" OR "STI" OR "STIs" OR "STD" OR "STDs" OR "venereal disease*" OR "venereal infection" OR "venereal disorder" OR "genital herpes" OR "herpes genitalis" OR "genital infection" OR "genital disorder*" OR "herpes simplex" OR "herpes virus" OR "HSV" OR "chancroid" OR "chancroid" OR "haemophilus ducreyi" OR "chlamydia infection" OR "chlamydia trachomatis" OR "gonorrhoea" OR "gonorrhoea" OR "syphilis" OR "syphillis" OR "condylomata lata" OR "chancres" OR "lymphogranuloma venereum" OR "lymphogranuloma venereum" OR "granuloma inguinale" OR "donovania" OR "donovanosis" OR "calymmatobacterium granulomatis" OR "klebsiella granulomatis" OR "klebsiella granulomatis" OR "treponema pallidum" OR "treponema pallidum" OR "genital wart" OR "venereal wart" OR "condylomata acuminata" OR "human papillomavirus 6" OR "hpv" OR "hpv6" OR "human papillomavirus" OR "hepatitis b" OR "trichomonas vaginitis" OR "genital ulcer" OR "anogenital ulcer" OR "anorectal ulcer" OR "anorectal ulcer" OR "penile ulcer" OR "human papillomavirus" OR "hpv" OR "recurrent respiratory papillomatosis" OR "condyloma" |
| S1  | (MH "HIV Infections+") OR (MH "Human Immunodeficiency Virus+")                                                                                                                                                                                                                                                                                                                                                                                                                                                                                                                                                                                                                                                                                                                                                                                                                                                                                                                                                                                                                                                                                                                                                                                                                                                                                                                                                                            |

## Web of Science Core Collection.

|   |                                                                                                                                                                                                                                                                                                                                                                                                                                                                                                                                                                                                                                                                                                                                                                                                                                                                                                                                                                                                                                                                                                                                                                                                                                                                                                                                                                                                                                                                                                                                                                                                                                                                  |
|---|------------------------------------------------------------------------------------------------------------------------------------------------------------------------------------------------------------------------------------------------------------------------------------------------------------------------------------------------------------------------------------------------------------------------------------------------------------------------------------------------------------------------------------------------------------------------------------------------------------------------------------------------------------------------------------------------------------------------------------------------------------------------------------------------------------------------------------------------------------------------------------------------------------------------------------------------------------------------------------------------------------------------------------------------------------------------------------------------------------------------------------------------------------------------------------------------------------------------------------------------------------------------------------------------------------------------------------------------------------------------------------------------------------------------------------------------------------------------------------------------------------------------------------------------------------------------------------------------------------------------------------------------------------------|
| 4 | 1 AND 2 AND 3                                                                                                                                                                                                                                                                                                                                                                                                                                                                                                                                                                                                                                                                                                                                                                                                                                                                                                                                                                                                                                                                                                                                                                                                                                                                                                                                                                                                                                                                                                                                                                                                                                                    |
| 3 | TS: hiv* OR hiv infect* OR human immunodeficiency virus OR human immunodeficiency virus OR human immune deficiency virus OR human immune deficiency virus OR acquired immunodeficiency syndrome OR acquired immunodeficiency syndrome OR acquired immune deficiency syndrome OR acquired immune deficiency syndrome OR sexually transmitted disease* OR sexually transmissible disease* OR sexually transmitted infection* OR sexually transmissible infection* OR sexually transmitted infectious disease* OR sexually transmissible infectious disease* OR sexually transmitted disorder* OR sexually transmissible disorder* OR STI OR STIs OR STD OR STIs OR venereal disease* OR venereal infection* OR venereal disorder* OR genital herpes OR herpes genitalis OR genital infection* OR genital disorder* OR herpes simplex OR herpes virus OR HSV* OR chancroid OR chancroid* OR haemophilus ducreyi OR chlamydia infection* OR chlamydia trachomatis OR gonorrhoea* OR gonorrhoea* OR syphilis OR syphillis OR condylomata lata OR chancre* OR lymphogranuloma venereum OR lymphogranuloma venereum OR granuloma inguinale OR donovania OR donovanosis OR calymmatobacterium granulomatis OR klebsiella granulomatis OR klebsiella granulomatis OR treponema pallidum OR treponema pallidum OR genital wart* OR venereal wart* OR condylomata acuminata OR human papillomavirus 6 OR hpv* OR hpv6 OR human papillomavirus OR hepatitis b OR trichomonas vaginitis OR genital ulcer* OR anogenital ulcer* OR anorectal ulcer* OR anorectal ulcer* OR penile ulcer* OR human papillomavirus* or hpv or recurrent respiratory papillomatosis or condyloma* |
| 2 | TS: self collect* or home-based HIV test* or home-based STI test* or home-based STD test* or community-based test* or community-led test* or community-driven test* OR home-based test                                                                                                                                                                                                                                                                                                                                                                                                                                                                                                                                                                                                                                                                                                                                                                                                                                                                                                                                                                                                                                                                                                                                                                                                                                                                                                                                                                                                                                                                           |
| 1 | TS: college student* OR higher education OR teen* OR adolescen* OR university* OR university student*                                                                                                                                                                                                                                                                                                                                                                                                                                                                                                                                                                                                                                                                                                                                                                                                                                                                                                                                                                                                                                                                                                                                                                                                                                                                                                                                                                                                                                                                                                                                                            |

## Cochrane Database

| # | Query                                                                                                                                                                                                                                                                                                                                                                                                                                                                                                                                                                                                                                                                                                                                                                                                                                                                                                                                                                                                                                                                                                                                                                                                                                                                                                                                                                                                                                                                                                                                                                                                                                        |
|---|----------------------------------------------------------------------------------------------------------------------------------------------------------------------------------------------------------------------------------------------------------------------------------------------------------------------------------------------------------------------------------------------------------------------------------------------------------------------------------------------------------------------------------------------------------------------------------------------------------------------------------------------------------------------------------------------------------------------------------------------------------------------------------------------------------------------------------------------------------------------------------------------------------------------------------------------------------------------------------------------------------------------------------------------------------------------------------------------------------------------------------------------------------------------------------------------------------------------------------------------------------------------------------------------------------------------------------------------------------------------------------------------------------------------------------------------------------------------------------------------------------------------------------------------------------------------------------------------------------------------------------------------|
| 4 | 1 AND 2 AND 3                                                                                                                                                                                                                                                                                                                                                                                                                                                                                                                                                                                                                                                                                                                                                                                                                                                                                                                                                                                                                                                                                                                                                                                                                                                                                                                                                                                                                                                                                                                                                                                                                                |
| 3 | Title Abstract Keyword: hiv* OR hiv infect* OR human immunodeficiency virus OR human immunodeficiency virus OR human immune deficiency virus OR human immune deficiency virus OR acquired immunodeficiency syndrome OR acquired immunodeficiency syndrome OR acquired immune deficiency syndrome OR sexually transmitted disease* OR sexually transmissible disease* OR sexually transmitted infection* OR sexually transmissible infection* OR sexually transmitted infectious disease* OR sexually transmissible infectious disease* OR sexually transmitted disorder* OR sexually transmissible disorder* OR STI OR STIs OR STD OR STIs OR venereal disease* OR venereal infection* OR venereal disorder* OR genital herpes OR herpes genitalis OR genital infection* OR genital disorder* OR herpes simplex OR herpes virus OR HSV* OR chancroid OR chancroid* OR haemophilus ducreyi OR chlamydia infection* OR chlamydia trachomatis OR gonorrhoea* OR gonorrhoea* OR syphilis OR syphilis OR condylomata lata OR chancre* OR lymphogranuloma venereum OR lymphogranuloma venereum OR granuloma inguinale OR donovania OR donovanosis OR calymmatobacterium granulomatis OR klebsiella granulomatis OR klebsiella granulomatis OR treponema pallidum OR treponema pallidum OR genital wart* OR venereal wart* OR condylomata acuminata OR human papillomavirus 6 OR hpv* OR hpv6 OR human papillomavirus OR hepatitis b OR trichomonas vaginitis OR genital ulcer* OR anogenital ulcer* OR anorectal ulcer* OR anorectal ulcer* OR penile ulcer* OR human papillomavirus* or hpv OR recurrent respiratory papillomatosis or condyloma* |
| 2 | Title Abstract Keyword: self collect* or home-based HIV test* or home-based STI test* or home-based STD test* or community-based test* or community-led test* or community-driven test* OR home-based test*                                                                                                                                                                                                                                                                                                                                                                                                                                                                                                                                                                                                                                                                                                                                                                                                                                                                                                                                                                                                                                                                                                                                                                                                                                                                                                                                                                                                                                  |
| 1 | Title Abstract Keyword: college student* OR higher education OR teen* OR adolescen* OR university* OR university student*                                                                                                                                                                                                                                                                                                                                                                                                                                                                                                                                                                                                                                                                                                                                                                                                                                                                                                                                                                                                                                                                                                                                                                                                                                                                                                                                                                                                                                                                                                                    |

## PubMed

| # | Query                                                                                                                                                                                                                                                                                                                                                                                                                                                                                                                                                                                                                                                                                                                                                                                                                                                                                                                                                                                                                                                                                                                                                                                                                                                                                                                                                                                                                                                                                                                                                                                                                                                                                                                                                                                                                                                                                                                                                                                                                                                                                                                                                                                                                                                                                                                                                                                                                                                                                                                                                                                                                                                                                                                                                                                                                                                                                                                                                                                                                                                                                                                                                                                                                                                                                                                                                    |
|---|----------------------------------------------------------------------------------------------------------------------------------------------------------------------------------------------------------------------------------------------------------------------------------------------------------------------------------------------------------------------------------------------------------------------------------------------------------------------------------------------------------------------------------------------------------------------------------------------------------------------------------------------------------------------------------------------------------------------------------------------------------------------------------------------------------------------------------------------------------------------------------------------------------------------------------------------------------------------------------------------------------------------------------------------------------------------------------------------------------------------------------------------------------------------------------------------------------------------------------------------------------------------------------------------------------------------------------------------------------------------------------------------------------------------------------------------------------------------------------------------------------------------------------------------------------------------------------------------------------------------------------------------------------------------------------------------------------------------------------------------------------------------------------------------------------------------------------------------------------------------------------------------------------------------------------------------------------------------------------------------------------------------------------------------------------------------------------------------------------------------------------------------------------------------------------------------------------------------------------------------------------------------------------------------------------------------------------------------------------------------------------------------------------------------------------------------------------------------------------------------------------------------------------------------------------------------------------------------------------------------------------------------------------------------------------------------------------------------------------------------------------------------------------------------------------------------------------------------------------------------------------------------------------------------------------------------------------------------------------------------------------------------------------------------------------------------------------------------------------------------------------------------------------------------------------------------------------------------------------------------------------------------------------------------------------------------------------------------------------|
| 4 | 1 AND 2 AND 3                                                                                                                                                                                                                                                                                                                                                                                                                                                                                                                                                                                                                                                                                                                                                                                                                                                                                                                                                                                                                                                                                                                                                                                                                                                                                                                                                                                                                                                                                                                                                                                                                                                                                                                                                                                                                                                                                                                                                                                                                                                                                                                                                                                                                                                                                                                                                                                                                                                                                                                                                                                                                                                                                                                                                                                                                                                                                                                                                                                                                                                                                                                                                                                                                                                                                                                                            |
| 3 | (((("sexually transmitted disease"[Title/Abstract] OR "sexually transmissible disease"[Title/Abstract] OR "sexually transmitted infection"[Title/Abstract] OR "sexually transmissible infection"[Title/Abstract] OR "sexually transmitted infectious disease"[Title/Abstract] OR "sexually transmissible infectious disease"[Title/Abstract] OR "sexually transmitted disorder"[Title/Abstract] OR "sexually transmissible disorder"[Title/Abstract] OR "STI"[Title/Abstract] OR "STIs"[Title/Abstract] OR "STD"[Title/Abstract] OR "STDs"[Title/Abstract] OR "venereal disease*"[Title/Abstract] OR "venereal infection"[Title/Abstract] OR "venereal disorder"[Title/Abstract] OR "genital herpes"[Title/Abstract] OR "herpes genitalis"[Title/Abstract] OR "genital infection"[Title/Abstract] OR "genital disorder*"[Title/Abstract] OR "herpes simplex"[Title/Abstract] OR "herpes virus"[Title/Abstract] OR "HSV"[Title/Abstract] OR "chancroid"[Title/Abstract] OR "chancroid"[Title/Abstract] OR "haemophilus ducreyi"[Title/Abstract] OR "chlamydia infection"[Title/Abstract] OR "chlamydia trachomatis"[Title/Abstract] OR "gonorrhoea"[Title/Abstract] OR "gonorrhoea"[Title/Abstract] OR "syphilis"[Title/Abstract] OR "syphillis"[Title/Abstract] OR "condylomata lata"[Title/Abstract] OR "chancre"[Title/Abstract] OR "lymphogranuloma venereum"[Title/Abstract] OR "granuloma inguinale"[Title/Abstract] OR "donovania"[Title/Abstract] OR "donovanosis"[Title/Abstract] OR "calymmatobacterium granulomatis"[Title/Abstract] OR "klebsiella granulomatis"[Title/Abstract] OR "treponema pallidum"[Title/Abstract] OR "genital wart"[Title/Abstract] OR "venereal wart"[Title/Abstract] OR "condylomata acuminata"[Title/Abstract] OR "human papillomavirus 6"[Title/Abstract] OR "hpv"[Title/Abstract] OR "hpv6"[Title/Abstract] OR "human papillomavirus"[Title/Abstract] OR "hepatitis b"[Title/Abstract] OR "trichomonas vaginitis"[Title/Abstract] OR "genital ulcer"[Title/Abstract] OR "anogenital ulcer"[Title/Abstract] OR "anorectal ulcer"[Title/Abstract] OR "penile ulcer"[Title/Abstract] OR "recurrent respiratory papillomatosis"[Title/Abstract] OR "condyloma"[Title/Abstract] OR OR[Title/Abstract] OR OR[Title/Abstract] OR OR[Title/Abstract] OR ("sexually transmitted infections"[MeSH Terms] OR "hepatitis b"[MeSH Terms] OR "herpes genitalis"[MeSH Terms] OR "syphilis"[MeSH Terms] OR "gonorrhoea"[MeSH Terms] OR "chlamydia trachomatis"[MeSH Terms] OR "calymmatobacterium"[MeSH Terms] OR "trichomonas vaginitis"[MeSH Terms] OR "Alphapapillomavirus"[MeSH Terms] OR "Human papillomavirus 6"[MeSH Terms] OR "Human papillomavirus 11"[MeSH Terms] OR "Human papillomavirus 16"[MeSH Terms] OR "Human papillomavirus 18"[MeSH Terms] OR "Human papillomavirus 31"[MeSH Terms] OR "Betapapillomavirus"[MeSH Terms] OR "Gammapapillomavirus"[MeSH Terms] OR "granuloma Inguinale"[MeSH Terms])) OR ("HIV Infections"[MeSH Terms] OR "HIV"[MeSH Terms] OR "hiv"[Title/Abstract] OR "hiv infection"[Title/Abstract] OR "human immunodeficiency virus"[Title/Abstract] OR "human immunodeficiency virus"[Title/Abstract] OR "human immune deficiency virus"[Title/Abstract] OR "acquired immunodeficiency syndrome"[Title/Abstract] OR "acquired immune deficiency syndrome"[Title/Abstract])) - Saved search |
| 2 | ((("home testing" OR "self test" OR "self sample" OR "self sampling" OR "rapid diagnostic test" OR "self collect" OR "home-based HIV test" OR "home-based STI test" OR "home-based STD test" OR "community-based test" OR "community-led test" OR "community-driven test") OR (self testing[MeSH Terms])))                                                                                                                                                                                                                                                                                                                                                                                                                                                                                                                                                                                                                                                                                                                                                                                                                                                                                                                                                                                                                                                                                                                                                                                                                                                                                                                                                                                                                                                                                                                                                                                                                                                                                                                                                                                                                                                                                                                                                                                                                                                                                                                                                                                                                                                                                                                                                                                                                                                                                                                                                                                                                                                                                                                                                                                                                                                                                                                                                                                                                                               |
| 1 | (((("Students"[MeSH Terms] OR "Universities" [MeSH Terms] OR "Young Adult"[MeSH Terms] OR "Adolescent"[MeSH Terms]) OR ("college student"[Title/Abstract] OR "higher education"[Title/Abstract] OR "teen"[Title/Abstract] OR "adolescent"[Title/Abstract] OR "adolescence"[Title/Abstract])))                                                                                                                                                                                                                                                                                                                                                                                                                                                                                                                                                                                                                                                                                                                                                                                                                                                                                                                                                                                                                                                                                                                                                                                                                                                                                                                                                                                                                                                                                                                                                                                                                                                                                                                                                                                                                                                                                                                                                                                                                                                                                                                                                                                                                                                                                                                                                                                                                                                                                                                                                                                                                                                                                                                                                                                                                                                                                                                                                                                                                                                            |
